# Supplementary material
Source: Royal Society of Chemistry journal article supplement (doi:10.1039/d6qi00499g)
Supplement: d6qi00499g1.pdf [file d6qi00499g1.pdf]

## Supplementary Information

### **Water Splitting with Cobalt-incorporated Ruthenium Sulfide (Co<sub>x</sub>RuS) and Molecular Cobalt Porphyrin**

Nasim Jafari, Neidy Ocuane, Brenda Torres, Jose L. Lasso, Carlos R. Cabrera, Dino Villagrán\*

Corresponding author: Dino Villagrán\*

[dino@utep.edu](mailto:dino@utep.edu)

## Table of contents

|                                                                                                                                                                                           |                                     |
|-------------------------------------------------------------------------------------------------------------------------------------------------------------------------------------------|-------------------------------------|
| <b>Figure S1.</b> UV-Vis absorption spectrum of CoTcPP .....                                                                                                                              | 3                                   |
| <b>Figure S2.</b> EDS elemental mapping and spectra of the C-Co <sub>4</sub> RuS catalyst .....                                                                                           | 4                                   |
| <b>Figure S3.</b> Overall water splitting using CoTcPP/C-Co <sub>4</sub> RuS as the working electrode and C-Co <sub>4</sub> RuS as the counter electrode.....                             | <b>Error! Bookmark not defined.</b> |
| <b>Figure S4.</b> Equivalent circuit model used for EIS fitting .....                                                                                                                     | 5                                   |
| <b>Figure S5.</b> Cyclic voltammograms of C-Co <sub>4</sub> RuS recorded in the non-Faradaic potential region. ...                                                                        | 6                                   |
| <b>Figure S6.</b> Cyclic voltammograms of CoTcPP recorded in the non-Faradaic potential region.....                                                                                       | 7                                   |
| <b>Figure S7.</b> Cyclic voltammograms of CoTcPP/C-Co <sub>4</sub> RuS recorded in the non-Faradaic potential region .....                                                                | 8                                   |
| <b>Figure S8.</b> ECSA-normalized OER polarization curves of C-Co <sub>4</sub> RuS, CoTcPP, and CoTcPP/C-Co <sub>4</sub> RuS in 1.0 M KOH.....                                            | 9                                   |
| <b>Figure S9.</b> Potentiostatic stability (bulk electrolysis) test of C-Co <sub>4</sub> RuS for the hydrogen evolution reaction (HER) .....                                              | 10                                  |
| <b>Figure S10.</b> Potentiostatic stability (bulk electrolysis) test of CoTcPP/C-Co <sub>4</sub> RuS for the oxygen evolution reaction (OER).....                                         | 11                                  |
| <b>Figure S11.</b> XPS spectra of CoTcPP/C-Co <sub>4</sub> RuS before and after 25 h bulk electrolysis in oxidation condition .....                                                       | 12                                  |
| <b>Table S1.</b> Estimated nominal Ru loading of catalyst-coated electrodes and corresponding OER overpotential.....                                                                      | 13                                  |
| <b>Table S2.</b> Fitted electrochemical impedance spectroscopy (EIS) parameters .....                                                                                                     | 13                                  |
| <b>Table S3.</b> Comparison of the oxygen evolution reaction (OER) activity of CoTcPP/C-Co <sub>4</sub> RuS with representative Ru-based electrocatalysts reported in alkaline media..... | 14                                  |

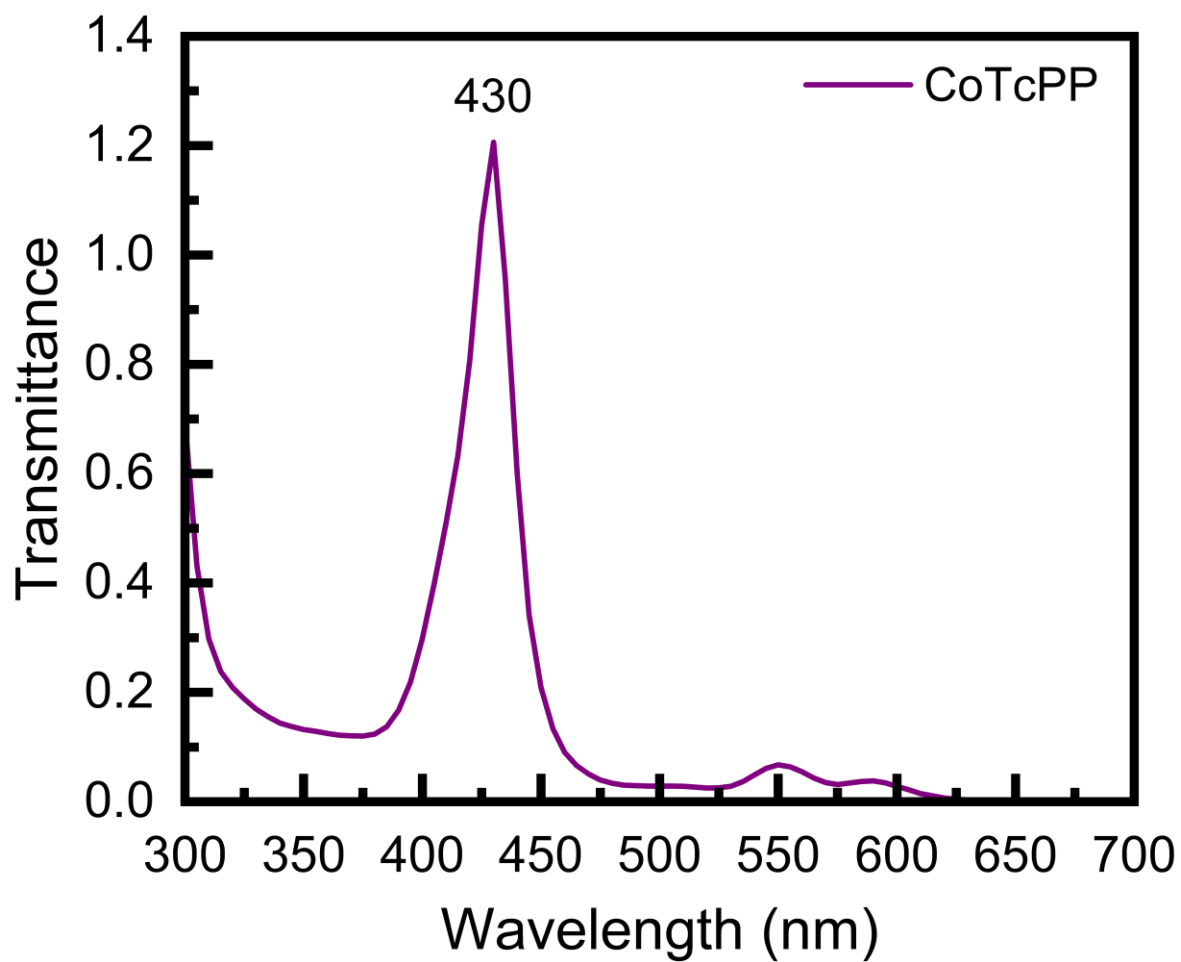

**Figure S1.** UV-Vis absorption spectrum of CoTcPP, showing a strong Soret band at 430 nm and Q bands of 550 nm and 595 nm, confirming the successful synthesis of CoTcPP.

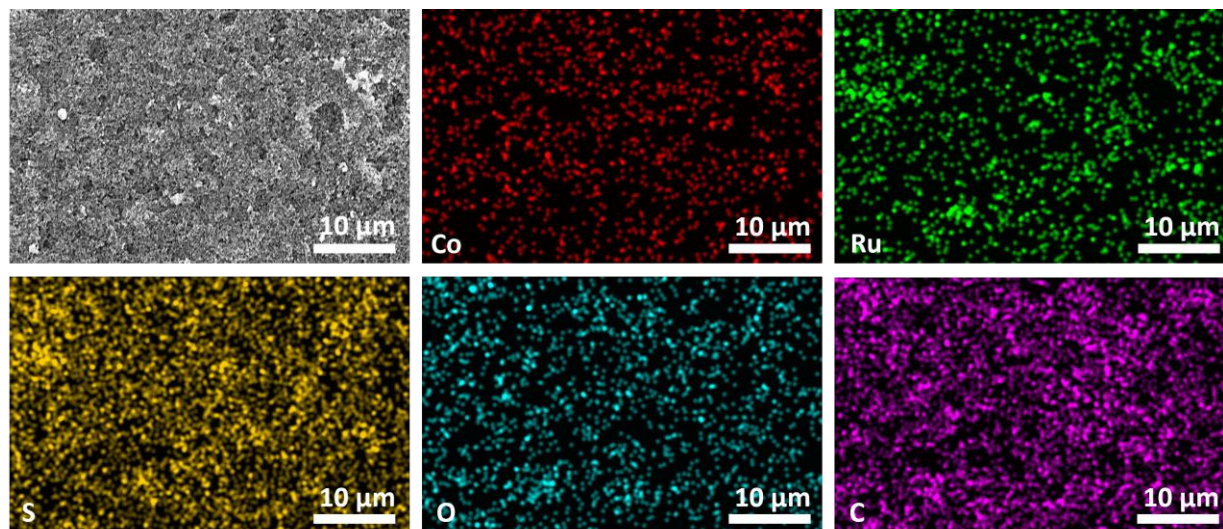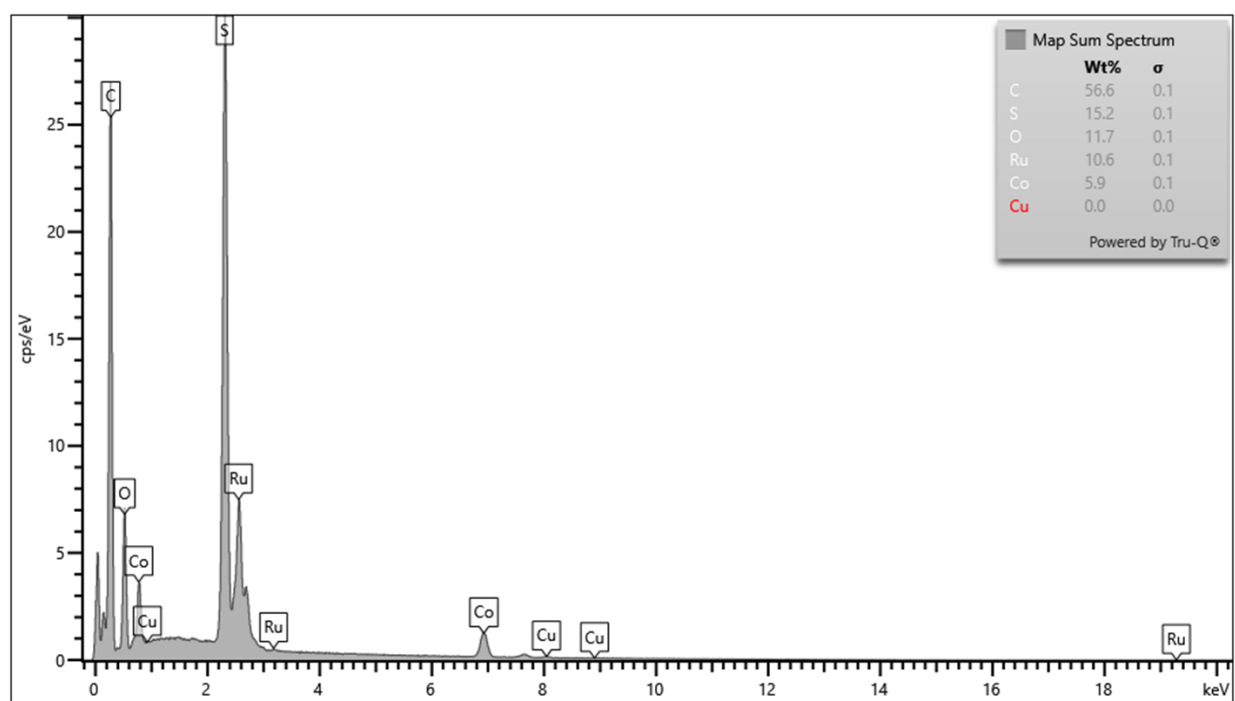

**Figure S2.** EDS elemental mapping and spectra of the C-Co<sub>4</sub>RuS catalyst, showing the uniform distribution of C, Ru, Co, and S elements across the surface of electrode. The detected oxygen likely is from partial surface oxidation of the sulfide, forming oxides or hydroxides during exposure to air.

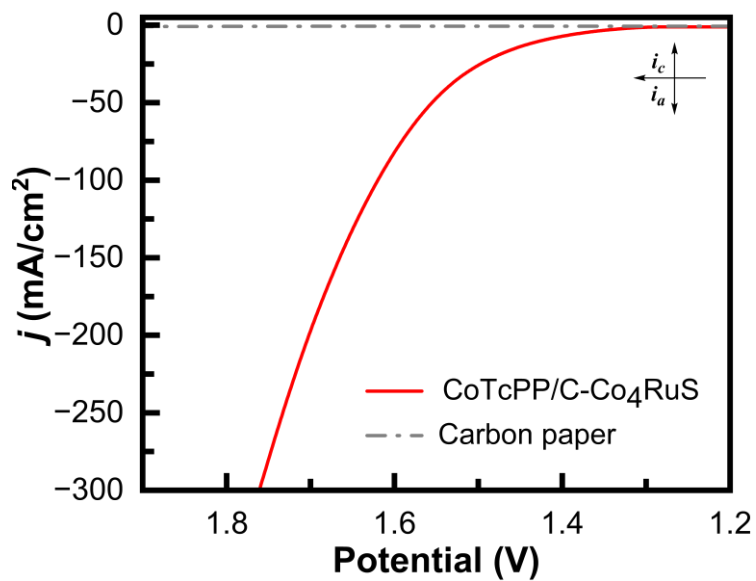

**Figure S3.** Overall water splitting using CoTcPP/C-Co<sub>4</sub>RuS as the OER working electrode and C-Co<sub>4</sub>RuS as the HER counter electrode in 1.0 M KOH. As illustrated, the modified electrode system exhibited improved electrocatalytic behavior.

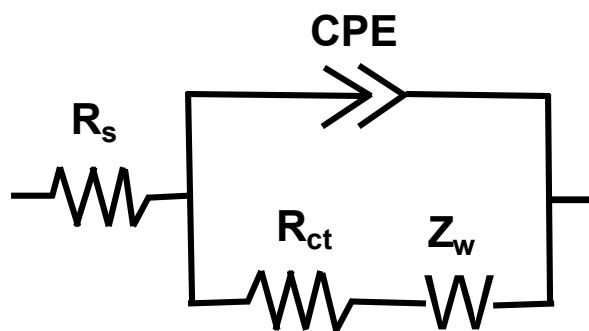

**Figure S4.** Equivalent circuit model used for EIS fitting, consisting of solution resistance ( $R_s$ ), charge transfer resistance ( $R_{ct}$ ), constant phase element (CPE), and Warburg impedance (W) for diffusion processes.

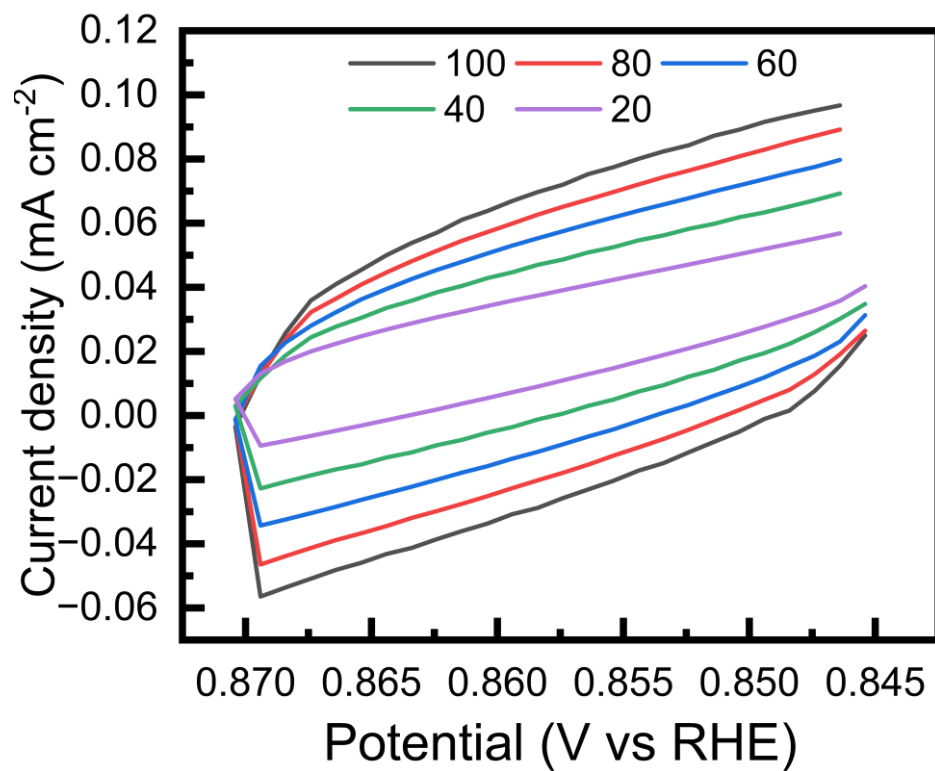

**Figure S5.** Cyclic voltammograms of C-Co<sub>4</sub>RuS recorded in the non-Faradaic potential region at different scan rates (20-100 mV s<sup>-1</sup>) in 1.0 M KOH. The capacitive current response increases linearly with the scan rate and resulting C<sub>dl</sub> was 397.2 μF cm<sup>-2</sup>.

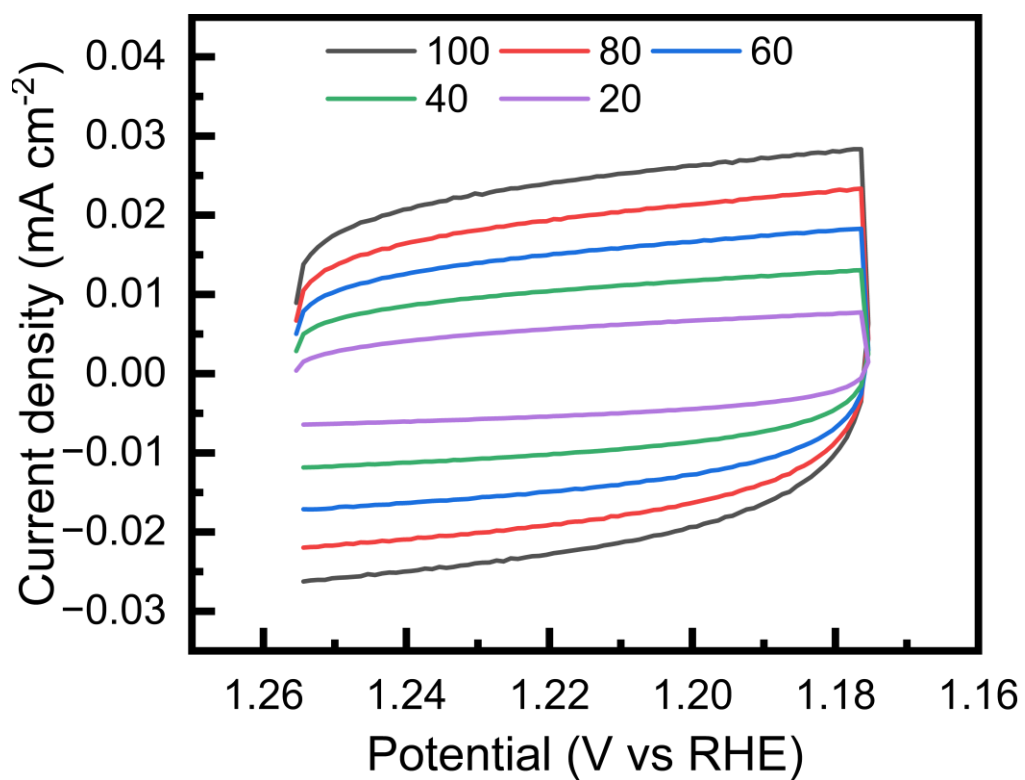

**Figure S6.** Cyclic voltammograms of CoTcPP recorded in the non-Faradaic potential region at different scan rates (20-100 mV s<sup>-1</sup>) in 1.0 M KOH. The capacitive current response increases linearly with the scan rate and resulting  $C_{dl}$  was 221.6  $\mu\text{F cm}^{-2}$ .

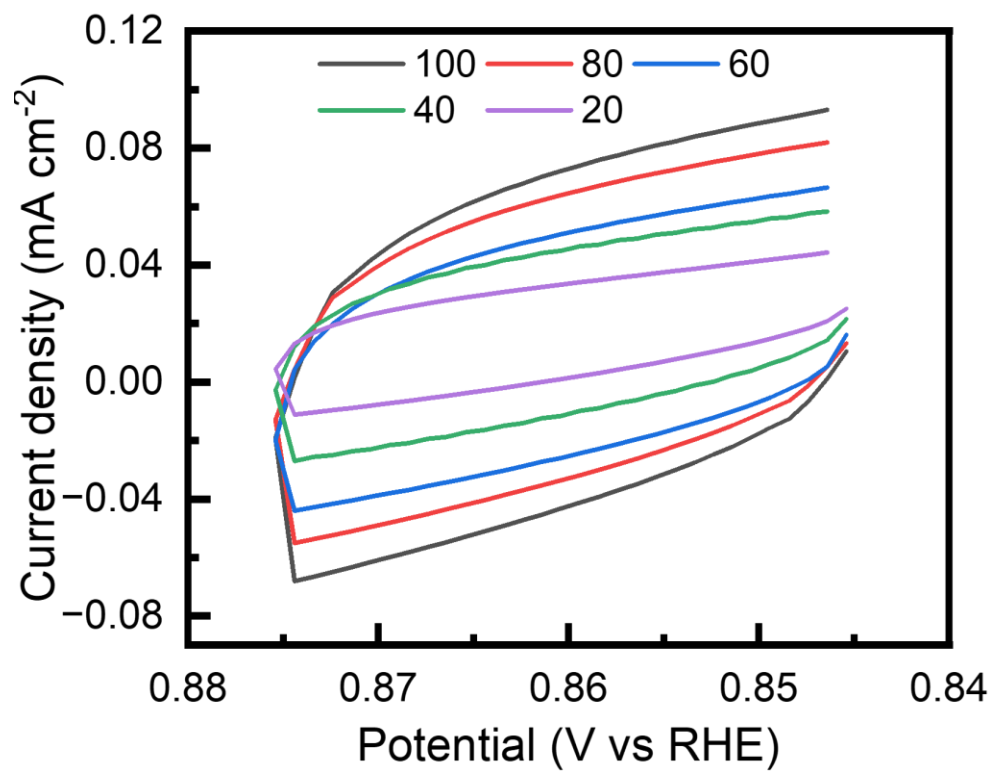

**Figure S7.** Cyclic voltammograms of CoTcPP/C-Co<sub>4</sub>RuS recorded in the non-Faradaic potential region at different scan rates (20-100 mV s<sup>-1</sup>) in 1.0 M KOH. The capacitive current response increases linearly with scan rate and resulting C<sub>dl</sub> was 485.1 μF cm<sup>-2</sup>.

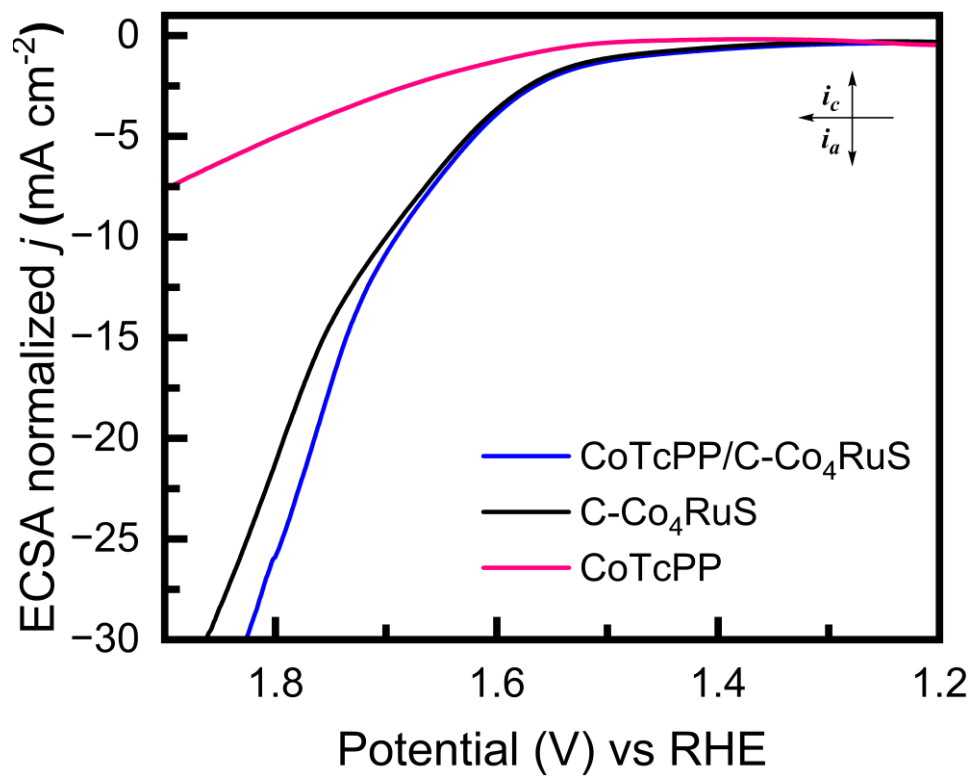

**Figure S8.** ECSA-normalized OER polarization curves of C-Co<sub>4</sub>RuS, CoTcPP, and CoTcPP/C-Co<sub>4</sub>RuS in 1.0 M KOH. Current densities were normalized using the estimated electrochemical surface areas obtained by double-layer capacitance ( $C_{dl}$ ) measurements (CoTcPP: 5.54 cm<sup>2</sup>, C-Co<sub>4</sub>RuS: 9.93 cm<sup>2</sup>, CoTcPP/C-Co<sub>4</sub>RuS: 12.13 cm<sup>2</sup>).

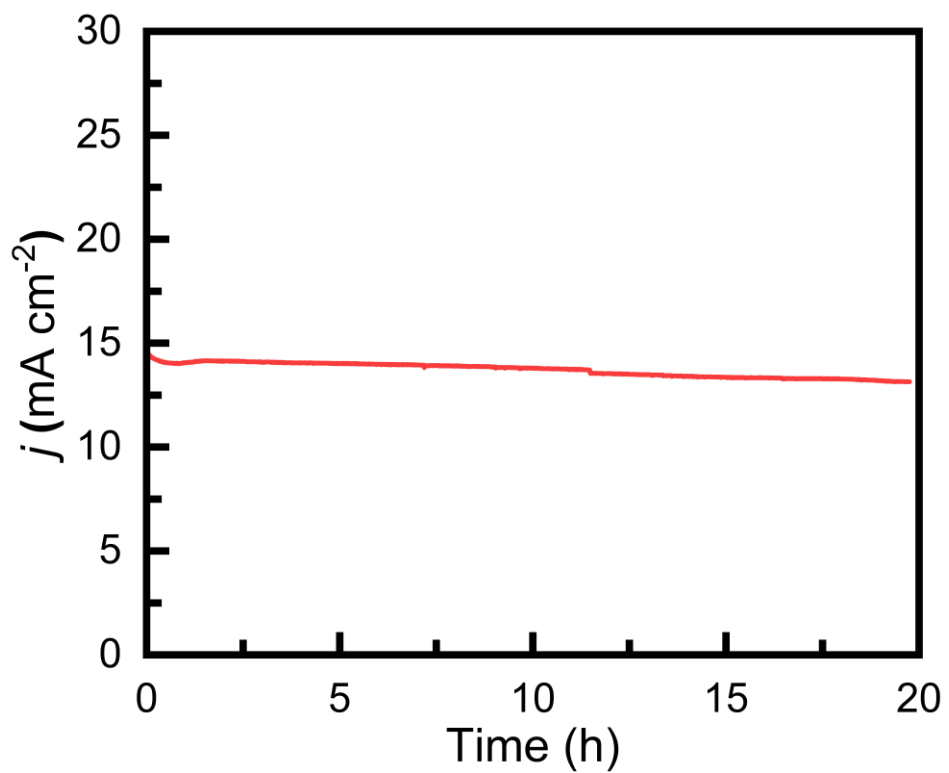

**Figure S9.** Potentiostatic stability (bulk electrolysis) test of C-Co<sub>4</sub>RuS for the hydrogen evolution reaction (HER) at -0.14 V vs RHE in 0.5 M H<sub>2</sub>SO<sub>4</sub>. The current density only decreases by ~8% over 20 h, which shows the durability of the catalyst under reductive conditions.

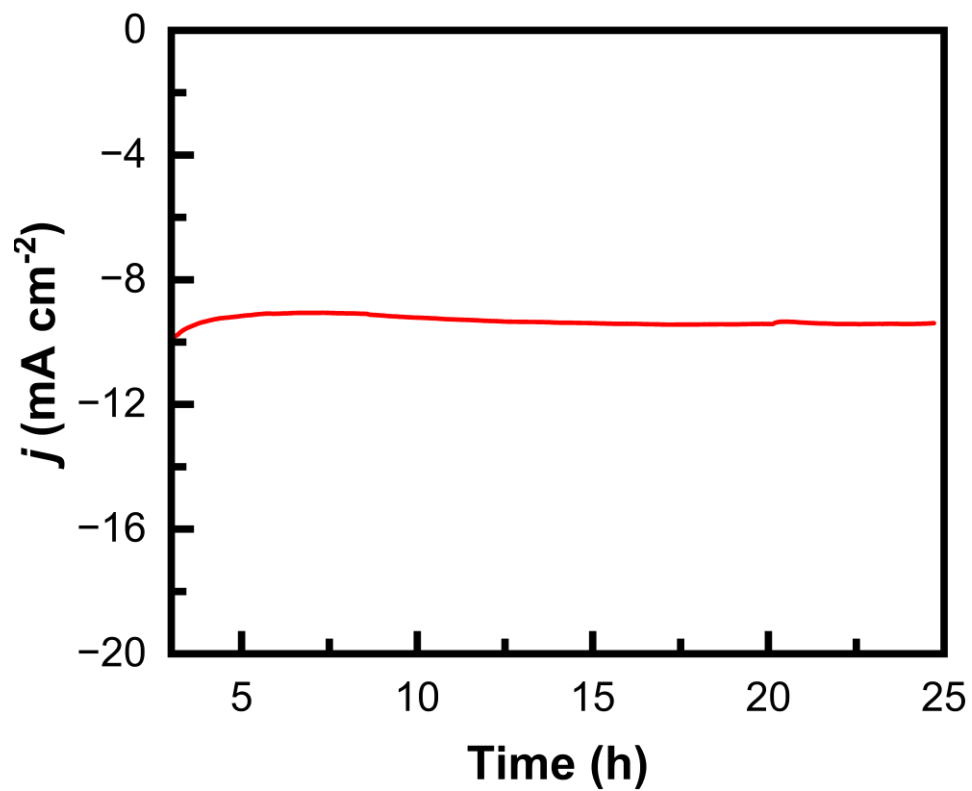

**Figure S10.** Potentiostatic stability (bulk electrolysis) test of CoTcPP/C-Co<sub>4</sub>RuS for the oxygen evolution reaction (OER) at 1.52 V vs RHE in 1.0 M KOH. The current density only decreases by ~3% over 25 h, which shows the durability of the catalyst under oxidative conditions.

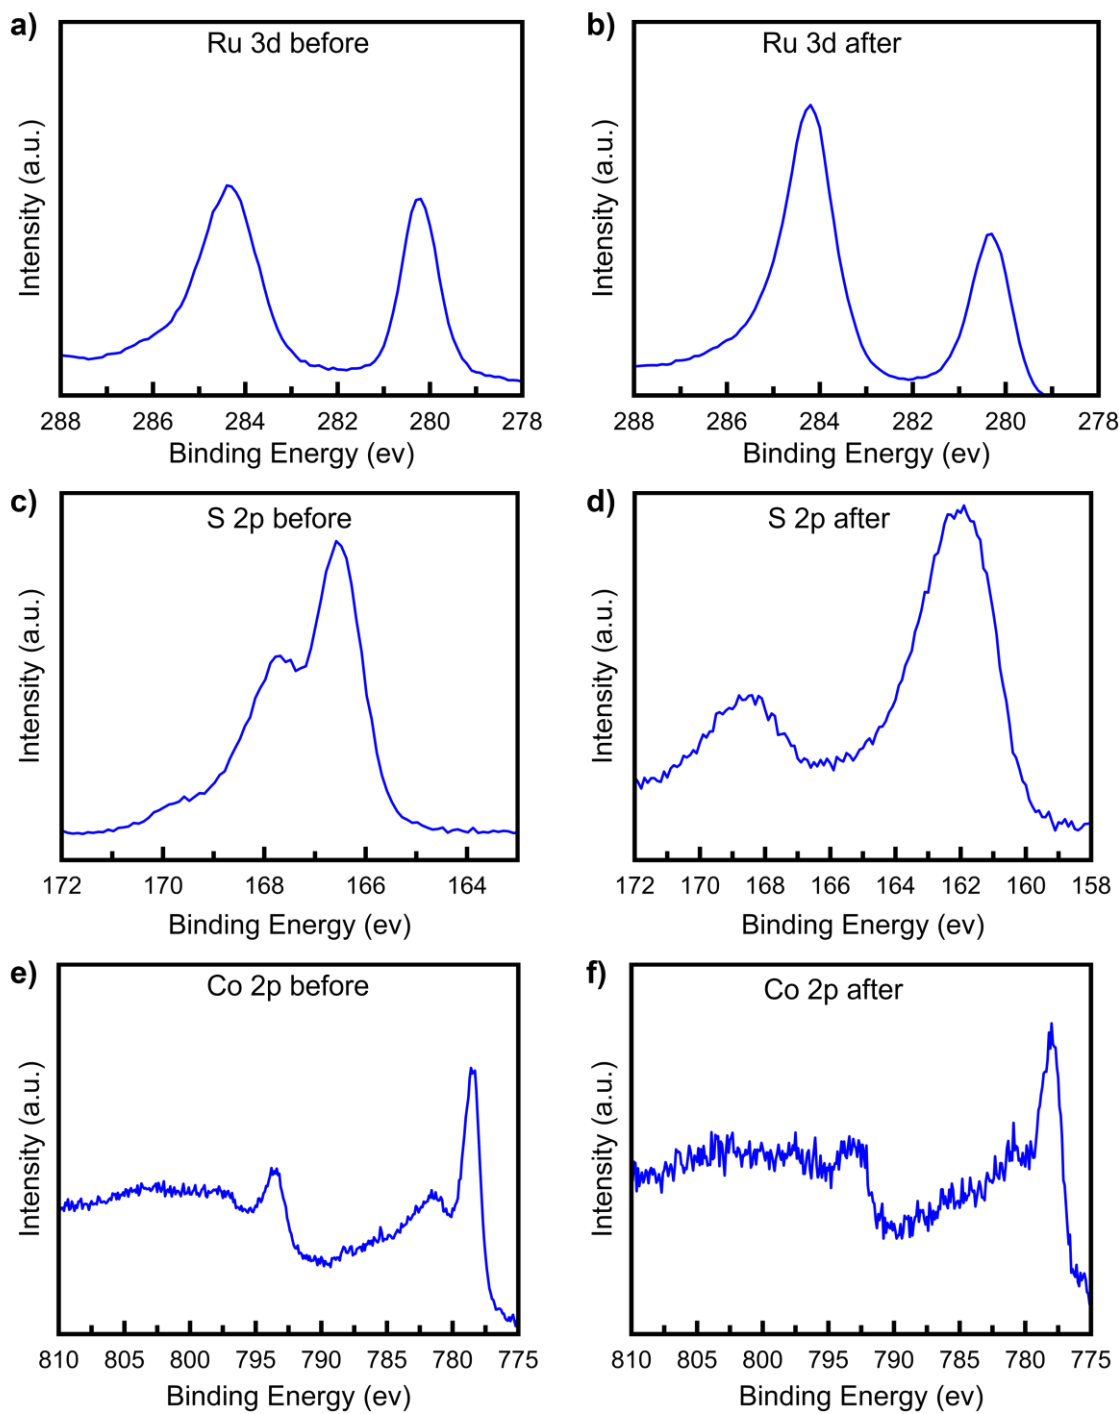

**Figure S11.** XPS spectra of CoTcPP/C-Co<sub>4</sub>RuS before and after 25 h bulk electrolysis in oxidation condition. The comparison shows that the main elemental signals remain present after the stability test, confirming the overall retention of the catalyst composition. At the same time, changes in peak profile and relative intensity are observed after electrolysis, indicating surface chemical evolution, including partial oxidation (Such as surface oxidized sulfur species) and reconstruction under operating conditions.

**Table S1.** Estimated nominal Ru loading of catalyst-coated electrodes and corresponding OER overpotential at 10 mA cm<sup>-2</sup> in KOH 1M.

| Catalyst                     | $\eta_{10}$ (mV) | Ru Loading ( $\mu\text{g cm}^{-2}$ ) |
|------------------------------|------------------|--------------------------------------|
| C-RuS                        | 379              | ~35.1–36.7                           |
| C-CoRuS                      | 265              | ~22.1–23.4                           |
| C-Co <sub>2</sub> RuS        | 283              | ~15.0–15.9                           |
| C-Co <sub>4</sub> RuS        | 257              | ~9.2–9.8                             |
| CoTcPP/C-Co <sub>4</sub> RuS | 202              | ~8.3–8.8                             |

**Table S2.** Fitted electrochemical impedance spectroscopy (EIS) parameters for bare carbon paper, C-RuS, C-Co<sub>4</sub>RuS, CoTcPP, and the CoTcPP/C-Co<sub>4</sub>RuS composite, based on the equivalent circuit model.  $R_s$  represents the solution resistance,  $R_{ct}$  is the charge transfer resistance, CPE is the constant phase element with its corresponding exponent  $n$ , and  $W$  is the Warburg impedance reflecting diffusion processes. The CoTcPP/C-Co<sub>4</sub>RuS composite exhibits the lowest  $R_{ct}$  and acceptable  $\chi^2$  value, indicating a better charge-transfer efficiency than other samples.

| Equivalent circuit parameters | Carbon paper | C-RuS    | C-Co <sub>4</sub> RuS | CoTcPP   | CoTcPP/C-Co <sub>4</sub> RuS |
|-------------------------------|--------------|----------|-----------------------|----------|------------------------------|
| $R_s$                         | 19.01        | 25.07    | 4.802                 | 15.93    | 12.92                        |
| CPE                           | 3.70E-06     | 1.55E-03 | 2.86E-03              | 2.10E-03 | 3.64E-03                     |
| $n$                           | 0.9009       | 0.5163   | 0.2394                | 0.5716   | 0.3518                       |
| $R_{ct}$                      | 1495         | 183.7    | 18.10                 | 35.39    | 12.79                        |
| $W$                           | 80.59        | 74.52    | 118.1                 | 46.54    | 139.6                        |
| $\chi^2$                      | 0.02826      | 0.01867  | 0.01970               | 0.01021  | 0.02096                      |

**Table S3.** Comparison of the oxygen evolution reaction (OER) activity of CoTcPP/C-Co<sub>4</sub>RuS with representative Ru-based electrocatalysts reported in alkaline media. The overpotential required to reach 10 mA cm<sup>-2</sup> ( $\eta_{10}$ ) is listed together with the Ru loading information as reported in the original literature. Where direct areal Ru loading values were not explicitly provided, the reported Ru content or estimated nominal loading is shown. Because catalyst preparation methods, substrates, and loading descriptors differ among studies, the comparison is intended to provide performance context rather than a strict one-to-one ranking.

| Catalyst                                                          | Electrolyte | $\eta_{10}$ for OER (mV)                       | Ru loading information                                                                                                                                |
|-------------------------------------------------------------------|-------------|------------------------------------------------|-------------------------------------------------------------------------------------------------------------------------------------------------------|
| <b>CoTcPP/C-Co<sub>4</sub>RuS (this work)</b>                     | 1.0 M KOH   | 202                                            | Nominal 8.3–8.8 $\mu\text{g Ru cm}^{-2}$                                                                                                              |
| <b>Ru/CoFe-LDH</b> <sup>1</sup>                                   | 1.0 M KOH   | 198                                            | 0.45 wt% Ru                                                                                                                                           |
| <b>Ru<sub>0.9</sub>Co<sub>0.1</sub>O<sub>y</sub></b> <sup>2</sup> | 1.0 M KOH   | 290                                            | Not explicitly reported, mass activity calculated from thin-film mass                                                                                 |
| <b>Ru–Ni(OH)<sub>2</sub></b> <sup>3</sup>                         | 1.0 M KOH   | 231.9                                          | Ru mass fraction in electrode = 0.51 wt%, actual Ru/Ni molar ratio $\approx$ 0.35%                                                                    |
| <b>Ru-SAC/NiCo<sub>2</sub>O<sub>4</sub></b> <sup>4</sup>          | 1.0 M KOH   | 280 (1.51 V vs RHE at 10 mA cm <sup>-2</sup> ) | 2.03 wt% Ru, catalyst loading 0.25 mg on 0.16 cm <sup>2</sup> , giving an estimated 31.7 $\mu\text{g Ru cm}^{-2}$                                     |
| <b>Ru–O–Mn/CPD</b> <sup>5</sup>                                   | 1.0 M KOH   | 194                                            | Estimated areal Ru loading $\approx$ 211 $\mu\text{g cm}^{-2}$ (from 41.4 wt% Ru and electrode ink deposition)                                        |
| <b>RuNiOx</b> <sup>6</sup>                                        | 1.0 M KOH   | 210                                            | Ru loading not explicitly reported, prepared by dip-coating from 5 mmol RuCl <sub>3</sub> + 5 mmol Ni precursor solution onto 1 $\times$ 2 cm Ti foam |

## References:

- 1 P. Li, M. Wang, X. Duan, L. Zheng, X. Cheng, Y. Zhang, Y. Kuang, Y. Li, Q. Ma, Z. Feng, W. Liu and X. Sun, *Nat Commun*, 2019, **10**, 1711.
- 2 M. M. Tellez-Cruz, A. Serrano-Lázaro, L. I. Olvera and M. Bizarro, *International Journal of Hydrogen Energy*, 2025, **168**, 150964.
- 3 J. Qi, R. Xu, T. Yang, M. Yang, J. Chen, J. Tu, B. Wang, C. Qu, Z. Wang, J. Cao and Y. Yan, *J. Mater. Chem. A*, 2025, **13**, 26555–26563.
- 4 A. Gupta, S. Ghosh, D. Bhalothia, S. Thangarasu, B. Ghosh, R. Urkude, J. Chowdhury and S. Pande, *J. Mater. Chem. A*, 2024, **12**, 23819–23836.
- 5 T. Feng, J. Yu, D. Yue, H. Song, S. Tao, G. I. N. Waterhouse, S. Lu and B. Yang, *Applied Catalysis B: Environmental*, 2023, **328**, 122546.
- 6 Y.-J. Ko, M. H. Han, C. Lim, S.-H. Yu, C. H. Choi, B. K. Min, J.-Y. Choi, W. H. Lee and H.-S. Oh, *Journal of Energy Chemistry*, 2023, **77**, 54–61.
